# Supplementary material
Source: bioRxiv or medRxiv preprint supplement (https://www.biorxiv.org/highwire/filestream/43175/field_highwire_adjunct_files/8/087247-9.pdf)

# BlpSRH<sup>D39</sup>

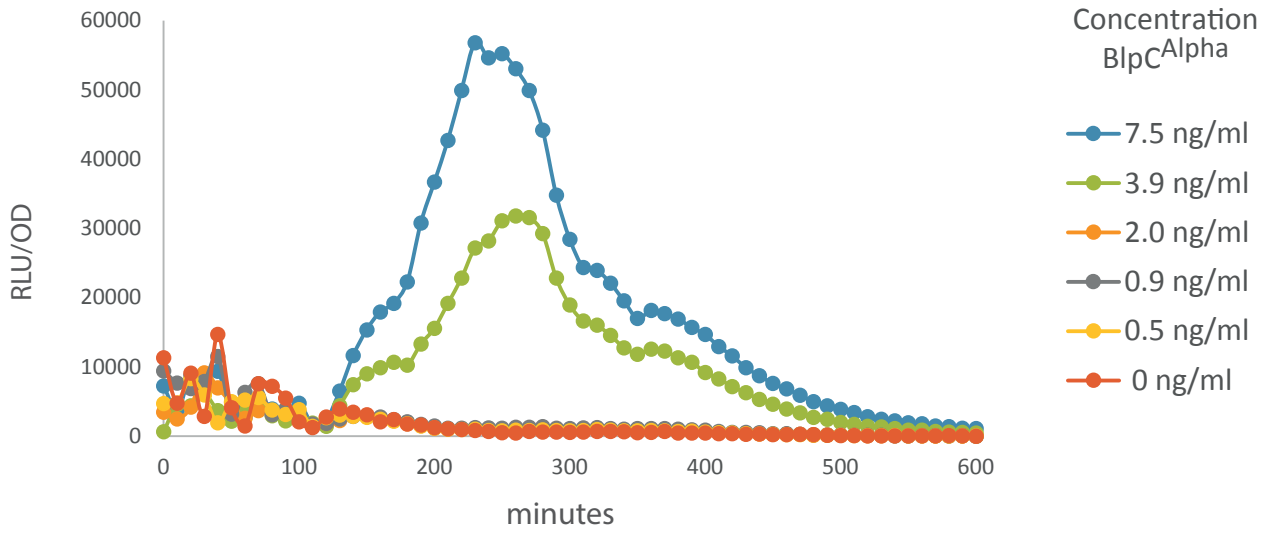

Supplement: Supplementary file [file 087247-9.pdf]
